# Supplementary material for: Exploring the role of V2O5 in the reactivity of NH4HSO4 with NO on V2O5/TiO2 SCR catalysts
Source: Royal Society of Chemistry journal article supplement (doi:10.1039/c6ra22571c), 2016-01-01
Supplement: c6ra22571c1.pdf [file c6ra22571c1.pdf]

Supporting information

**Exploring the role of  $V_2O_5$  in the reactivity of  $NH_4HSO_4$  with NO on  
 $V_2O_5/TiO_2$  SCR catalysts**

Ruiyang Qu,<sup>a†</sup> Dong Ye,<sup>a†</sup> Chenghang Zheng,<sup>a</sup> Xiang Gao,<sup>a\*</sup> Zhongyang Luo,<sup>a</sup> Mingjiang Ni,<sup>a</sup> Kefa Cen<sup>a</sup>

† These authors contributed equally to this work and should be considered as co-first authors.

*State Key Laboratory of Clean Energy Utilization, Department of Energy Engineering, Zhejiang University, Hangzhou,  
310027, China*

Corresponding author. Tel.: +86 571 87951335;

*E-mail*

*address:*

[xgao1@zju.edu.cn](mailto:xgao1@zju.edu.cn)

(X.

Gao)

## Figure captions

**Fig. S1.** XRD patterns of the series V/Ti catalysts

**Fig. S2.** FTIR spectra of the series V/Ti catalysts

**Fig. S3.** *In situ* DRIFTS study of the  $\text{NH}_4\text{HSO}_4$  decomposition behavior over the V4/Ti catalyst surface

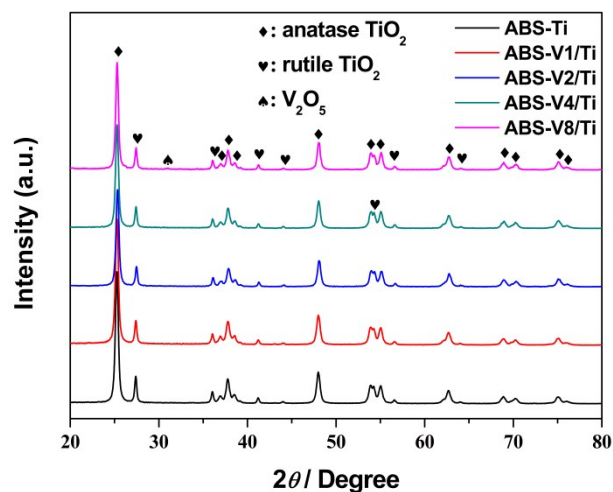

**Fig. S1.** XRD patterns of the series V/Ti catalysts

The XRD patterns of the series catalysts are presented in Fig. S1. All the diffraction peaks of the samples with V content lower than 8 wt% could be indexed to anatase TiO<sub>2</sub> and rutile TiO<sub>2</sub> phases. The absence of V<sub>2</sub>O<sub>5</sub> and NH<sub>4</sub>HSO<sub>4</sub> crystallites suggests that vanadium and sulfate species are highly dispersed, which exist in an amorphous state on the TiO<sub>2</sub> surface. Given increases in V<sub>2</sub>O<sub>5</sub> content to 8 wt%, new diffraction peaks indexed to V<sub>2</sub>O<sub>5</sub> phase appear, indicating that V loading is beyond the theoretical monolayer coverage on the TiO<sub>2</sub> support.<sup>1</sup>

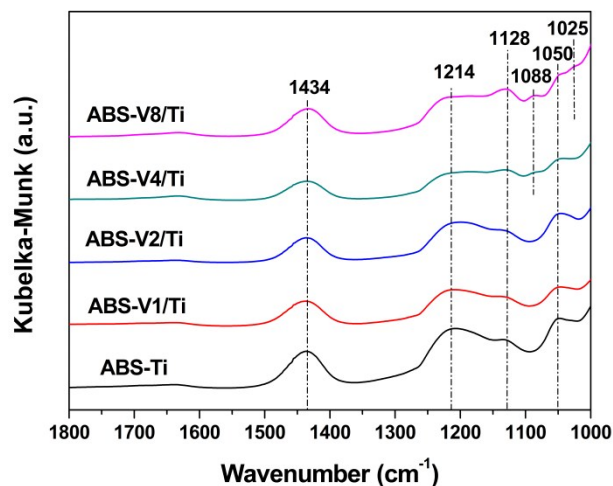

Fig. S2. FTIR spectra of the series V/Ti catalysts

In the case of the  $\text{NH}_4\text{HSO}_4$ -deposited samples, the characteristic peaks attributed to bidentate  $\text{SO}_4^{2-}$  at 1214, 1128, 1050  $\text{cm}^{-1}$  are generated, which are assigned to the  $\nu_3$  vibrations of bidentate  $\text{SO}_4^{2-}$  in  $\text{C}_{2v}$  symmetry (Fig. S2). The bands at 1214 and 1128  $\text{cm}^{-1}$  appear because of asymmetric and symmetric stretching of the S=O vibrations.<sup>2, 3</sup> In the meantime, the peak at 1050  $\text{cm}^{-1}$  is related to the asymmetric S-O stretching vibrations. Given an increase in  $\text{V}_2\text{O}_5$  content, new bands centered at 1088 and 1025  $\text{cm}^{-1}$ , which could be related to the stretching of the S-O vibrations in pure  $\text{NH}_4\text{HSO}_4$ , appear.<sup>4, 5</sup> The presence of vanadium species leads to a deficit in  $\text{TiO}_2$  surface basic sites, thereby allowing the appearance of pure  $\text{NH}_4\text{HSO}_4$  phase. Combined with the XRD patterns in Fig. S1,  $\text{NH}_4\text{HSO}_4$  might exist in the amorphous state.

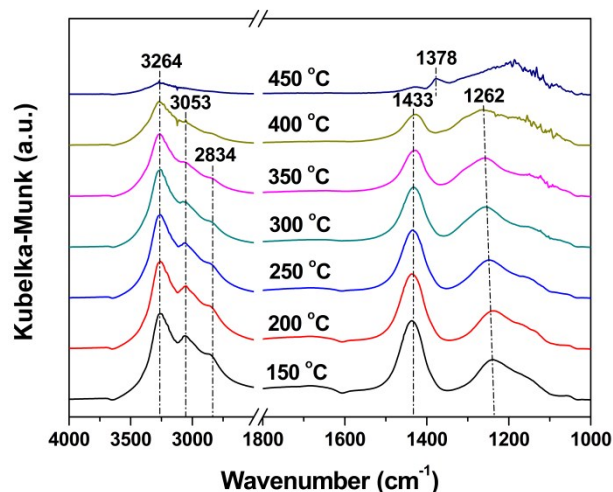

Fig. S3. *In situ* DRIFTS study of the NH<sub>4</sub>HSO<sub>4</sub> decomposition behavior over the V<sub>4</sub>/Ti catalyst surface

*In situ* DRIFTS was conducted to investigate the detailed NH<sub>4</sub>HSO<sub>4</sub> decomposition behavior on the catalyst surface. As is shown in Fig. S3, characteristic IR peaks centered at 1242 and 1433 cm<sup>-1</sup> attributed to bidentate SO<sub>4</sub><sup>2-</sup> and NH<sub>4</sub><sup>+</sup> appear when the temperature is 100 °C.<sup>6, 7</sup> In the meantime, the bands at 2834, 3050, 3262 cm<sup>-1</sup>, assigned to the stretching vibrations of N-H in NH<sub>4</sub><sup>+</sup> also come out.<sup>8</sup> With increasing temperature, the peak related to bidentate SO<sub>4</sub><sup>2-</sup> undergoes a blue shift, together with the occurrence of a decrease in the intensity of the bands attributed to sulfate and ammonium species. In addition, characteristic IR peak centered at 1378 cm<sup>-1</sup> attributed to tridentate SO<sub>4</sub><sup>2-</sup> comes out at a temperature of 450 °C, which might be due to the transformation of sulfate species from (M<sub>2</sub>SO<sub>4</sub>)H structure to (M-O)<sub>3</sub>=O one.<sup>9</sup>

## Tables

Table S1

N<sub>2</sub> adsorption results of the series V/Ti catalysts

| Samples   | BET (m <sup>2</sup> g <sup>-1</sup> ) | Pore volume (cm <sup>3</sup> g <sup>-1</sup> ) |
|-----------|---------------------------------------|------------------------------------------------|
| ABS-Ti    | 30                                    | 0.22                                           |
| ABS-V1/Ti | 30                                    | 0.23                                           |
| ABS-V2/Ti | 28                                    | 0.23                                           |
| ABS-V4/Ti | 24                                    | 0.22                                           |
| ABS-V8/Ti | 28                                    | 0.19                                           |

## Reference

- 1 G. Busca, L. Lietti, G. Ramis and F. Berti, *Appl. Catal., B*, 1998, **18**, 1-36.
- 2 X. Guo, C. Bartholomew, W. Hecker and L. L. Baxter, *Appl. Catal., B*, 2009, **92**, 30-40.
- 3 J. L. Roper-Vega, A. Aldana-Pérez, R. Gómez and M. E. Niño-Gómez, *Appl. Catal. A*, 2010, **379**, 24-29.
- 4 A. Goypiro, J. De Villepin and A. Novak, *J. Raman Spectrosc.*, 1980, **9**, 297-303.
- 5 M. Mamlouk, P. Ocon and K. Scott, *J. Power Sources*, 2014, **245**, 915-926.
- 6 B. Jiang, Z. Wu, Y. Liu, S.C. Lee and W.K. Ho, *J. Phys. Chem. C* 2010, **114**, 4961-4965.
- 7 R. Jin, Y. Liu, Z. Wu, H. Wang and T. Gu, *Catal. Today*, 2010, **153**, 84-89.
- 8 F. Liu, K. Asakura, H. He, W. Shan, X. Shi and C. Zhang, *Appl. Catal., B*, 2011, **103**, 369-377.
- 9 L. Zhang, L. Li, Y. Cao, X. Yao, C. Ge, F. Gao, Y. Deng, C. Tang and L. Dong, *Appl. Catal., B*, 2015, **165**, 589-598.
